# Supplementary material for: The Outcome of the Oxidations of Unusual Enediamide Motifs Is Governed by the Stabilities of the Intermediate Iminium Ions
Source: PLoS One. 2012 Oct 19;7(10):e47224. doi: 10.1371/journal.pone.0047224 (PMC3477162; doi:10.1371/journal.pone.0047224)
Supplement: Cif S1 — Crystallographic data file for compound 3. (CIF) [file pone.0047224.s008.cif]

data_global
 
#=======================================================================
 
# 1. SUBMISSION DETAILS
#----------------------
 
_publ_contact_author_name              ' Matthew H. Todd'    
_publ_contact_author_address               
;    
 School of Chemistry
 University of Sydney
 Sydney, NSW, 2006
 Australia
;
_publ_contact_author_email             matthew.todd@sydney.edu.au
_publ_contact_author_phone             ?
 
 
_publ_requested_journal                ?    
 
 
_publ_section_title                        
;    ?
;
 
loop_
_publ_author_name
_publ_author_address                       
 'Muneer Ahamed'                                         
;    
 School of Chemistry
 University of Sydney
 Sydney, NSW, 2006
 Australia
;
 'Bun Chan'                                         
;    
 School of Chemistry
 University of Sydney
 Sydney, NSW, 2006
 Australia
;
 'Paul Jensen'                                         
;    
 School of Chemistry
 University of Sydney
 Sydney, NSW, 2006
 Australia
;
 'Matthew H. Todd'                                         
;    
 School of Chemistry
 University of Sydney
 Sydney, NSW, 2006
 Australia
;
 
#=======================================================================
#  Data block for single structure (one for each study in the paper)
#  Structures separated by #===END
#=======================================================================
 

data_mht178 
 
_audit_creation_method            SHELXL-97 
_chemical_name_systematic 
; 
 ? 
; 
_chemical_name_common             ? 
_chemical_melting_point           ? 
_chemical_formula_moiety          ? 
_chemical_formula_sum 
 'C27 H25 Cl N2 O5' 
_chemical_formula_weight          492.94 
_chemical_absolute_configuration        syn
 
loop_ 
 _atom_type_symbol 
 _atom_type_description 
 _atom_type_scat_dispersion_real 
 _atom_type_scat_dispersion_imag 
 _atom_type_scat_source 
 'C'  'C'   0.0033   0.0016 
 'International Tables Vol C Tables 4.2.6.8 and 6.1.1.4' 
 'H'  'H'   0.0000   0.0000 
 'International Tables Vol C Tables 4.2.6.8 and 6.1.1.4' 
 'Cl'  'Cl'   0.1484   0.1585 
 'International Tables Vol C Tables 4.2.6.8 and 6.1.1.4' 
 'N'  'N'   0.0061   0.0033 
 'International Tables Vol C Tables 4.2.6.8 and 6.1.1.4' 
 'O'  'O'   0.0106   0.0060 
 'International Tables Vol C Tables 4.2.6.8 and 6.1.1.4' 

_symmetry_cell_setting               Orthorhombic
_symmetry_space_group_name_Hall      'P 2ac 2ab'
_symmetry_space_group_name_H-M       'P 21 21 21'
_symmetry_Int_Tables_number                 19
 
 
loop_ 
 _symmetry_equiv_pos_as_xyz 
 'x, y, z' 
 '-x+1/2, -y, z+1/2' 
 '-x, y+1/2, -z+1/2' 
 'x+1/2, -y+1/2, -z' 
 
_cell_length_a                    8.6489(13) 
_cell_length_b                    10.4140(15) 
_cell_length_c                    27.136(4) 
_cell_angle_alpha                 90.00 
_cell_angle_beta                  90.00 
_cell_angle_gamma                 90.00 
_cell_volume                      2444.2(6) 
_cell_formula_units_Z             4 
_cell_measurement_temperature     140(2) 
_cell_measurement_reflns_used     ? 
_cell_measurement_theta_min       1.75
_cell_measurement_theta_max       22.5
 
_exptl_crystal_description        needle
_exptl_crystal_colour             colourless
_exptl_crystal_size_max           0.40
_exptl_crystal_size_mid           0.07
_exptl_crystal_size_min           0.05
_exptl_crystal_density_meas       ? 
_exptl_crystal_density_diffrn     1.340 
_exptl_crystal_density_method     'not measured' 
_exptl_crystal_F_000              1032 
_exptl_absorpt_coefficient_mu     0.197 
_exptl_absorpt_correction_type    multi-scan
_exptl_absorpt_correction_T_min   0.80
_exptl_absorpt_correction_T_max   0.98
_exptl_absorpt_process_details     
;
 XPREP  (Bruker, 1995)
  and SADABS (Sheldrick, 1996)
;

_diffrn_crystal_treatment
;
attached with Exxon Paratone N, to a short length 
of glass fibre.
;
 
_diffrn_ambient_temperature       140(2) 
_diffrn_radiation_wavelength      0.71073 
_diffrn_radiation_type            MoK\a 
_diffrn_radiation_source          'sealed tube' 
_diffrn_radiation_monochromator   graphite 
_diffrn_measurement_device_type   'Bruker SMART 1000 CCD'
_diffrn_measurement_method        \w 
_diffrn_detector_area_resol_mean  ? 
_diffrn_standards_number          ? 
_diffrn_standards_interval_count  ? 
_diffrn_standards_interval_time   ? 
_diffrn_standards_decay_%         ?
_diffrn_reflns_number             10077
_diffrn_reflns_av_R_equivalents   0.0642 
_diffrn_reflns_av_sigmaI/netI     0.0861 
_diffrn_reflns_limit_h_min        -9
_diffrn_reflns_limit_h_max        9 
_diffrn_reflns_limit_k_min        -8
_diffrn_reflns_limit_k_max        11 
_diffrn_reflns_limit_l_min        -29
_diffrn_reflns_limit_l_max        30 
_diffrn_reflns_theta_min          2.09 
_diffrn_reflns_theta_max          23.27 
_reflns_number_total              2037 
_reflns_number_gt                 1375 
_reflns_threshold_expression      >2sigma(I) 
 
_computing_data_collection        'SMART (Bruker,1995)'
_computing_cell_refinement        'SAINT (Bruker,1995)'
_computing_data_reduction         'SAINT and XPREP (Bruker 1995)'
_computing_structure_solution     'SIR97 (Altomare, et. al. 1997)' 
_computing_structure_refinement   'SHELXL-97 (Sheldrick, 1997)' 
_computing_molecular_graphics     
;
  teXsan for Windows (MSC, 1997) 
  xtal 3.6 (Hall,du Boulay, D.J. & Olthof-Hazekamp, R. 1999)
  ORTEPII  (Johnson,C.K., 1976). 
  WinGX (Farrugia, 1999)
;
_computing_publication_material   ?
 
_refine_special_details 
; 
 Refinement of F^2^ against ALL reflections.  The weighted R-factor wR and 
 goodness of fit S are based on F^2^, conventional R-factors R are based 
 on F, with F set to zero for negative F^2^. The threshold expression of 
 F^2^ > 2sigma(F^2^) is used only for calculating R-factors(gt) etc. and is 
 not relevant to the choice of reflections for refinement.  R-factors based 
 on F^2^ are statistically about twice as large as those based on F, and R- 
 factors based on ALL data will be even larger. 
; 
 
_refine_ls_structure_factor_coef  Fsqd  
_refine_ls_matrix_type            full 
_refine_ls_weighting_scheme       calc  
_refine_ls_weighting_details 
 'calc w=1/[\s^2^(Fo^2^)+(0.0P)^2^+0.0P] where P=(Fo^2^+2Fc^2^)/3' 
_atom_sites_solution_primary      direct 
_atom_sites_solution_secondary    difmap 
_atom_sites_solution_hydrogens    geom 
_refine_ls_hydrogen_treatment     constr 
_refine_ls_extinction_method      none 
_refine_ls_extinction_coef        ? 
_refine_ls_abs_structure_details 
 'Not reliably determined from X-ray data' 
_refine_ls_number_reflns          2037 
_refine_ls_number_parameters      318 
_refine_ls_number_restraints      0 
_refine_ls_R_factor_all           0.0685 
_refine_ls_R_factor_gt            0.0334 
_refine_ls_wR_factor_ref          0.0397 
_refine_ls_wR_factor_gt           0.0366 
_refine_ls_goodness_of_fit_ref    0.934 
_refine_ls_restrained_S_all       0.934 
_refine_ls_shift/su_max           0.005 
_refine_ls_shift/su_mean          0.001 
 
loop_ 
 _atom_site_label 
 _atom_site_type_symbol 
 _atom_site_fract_x 
 _atom_site_fract_y 
 _atom_site_fract_z 
 _atom_site_U_iso_or_equiv 
 _atom_site_adp_type 
 _atom_site_occupancy 
 _atom_site_symetry_multiplicity 
 _atom_site_calc_flag 
 _atom_site_refinement_flags 
 _atom_site_disorder_assembly 
 _atom_site_disorder_group 
Cl1 Cl 0.26582(13) -0.40282(9) -0.07857(3) 0.0445(3) Uani 1 1 d . . . 
O1 O -0.1435(3) 0.0654(2) 0.18800(9) 0.0346(8) Uani 1 1 d . . . 
O2 O -0.2058(3) 0.3344(2) 0.04001(8) 0.0324(7) Uani 1 1 d . . . 
O3 O 0.3182(3) 0.2730(2) 0.04972(8) 0.0278(7) Uani 1 1 d . . . 
H3O H 0.2974 0.2312 0.0241 0.042 Uiso 1 1 calc R . . 
O4 O 0.1053(3) 0.0716(2) 0.05714(8) 0.0232(7) Uani 1 1 d . . . 
O5 O 0.2847(3) -0.0787(2) 0.07606(9) 0.0404(8) Uani 1 1 d . . . 
N1 N 0.0129(4) 0.1592(3) 0.13147(10) 0.0206(8) Uani 1 1 d . . . 
N2 N 0.0541(4) 0.3314(3) 0.05190(10) 0.0219(8) Uani 1 1 d . . . 
C1 C 0.1969(5) 0.1556(4) 0.25307(12) 0.0286(11) Uani 1 1 d . . . 
H1 H 0.0933 0.1536 0.2647 0.034 Uiso 1 1 calc R . . 
C2 C 0.3036(5) 0.2375(4) 0.27539(14) 0.0392(12) Uani 1 1 d . . . 
H2 H 0.2729 0.2923 0.3016 0.047 Uiso 1 1 calc R . . 
C3 C 0.4533(6) 0.2376(4) 0.25890(16) 0.0500(14) Uani 1 1 d . . . 
H3 H 0.5269 0.2931 0.2738 0.060 Uiso 1 1 calc R . . 
C4 C 0.4984(5) 0.1578(4) 0.22066(16) 0.0470(13) Uani 1 1 d . . . 
H4 H 0.6026 0.1583 0.2096 0.056 Uiso 1 1 calc R . . 
C5 C 0.3921(5) 0.0773(4) 0.19854(14) 0.0359(12) Uani 1 1 d . . . 
H5 H 0.4236 0.0221 0.1725 0.043 Uiso 1 1 calc R . . 
C6 C 0.2400(5) 0.0769(3) 0.21414(13) 0.0252(10) Uani 1 1 d . . . 
C7 C 0.1200(4) -0.0059(3) 0.18835(13) 0.0285(11) Uani 1 1 d . . . 
H7A H 0.0814 -0.0717 0.2116 0.034 Uiso 1 1 calc R . . 
H7B H 0.1692 -0.0510 0.1603 0.034 Uiso 1 1 calc R . . 
C8 C -0.0162(5) 0.0733(4) 0.16938(13) 0.0276(11) Uani 1 1 d . . . 
C9 C -0.1196(4) 0.2363(3) 0.11366(12) 0.0210(10) Uani 1 1 d . . . 
H9 H -0.2100 0.1773 0.1097 0.025 Uiso 1 1 calc R . . 
C10 C -0.0917(5) 0.3012(3) 0.06488(14) 0.0261(11) Uani 1 1 d . . . 
C11 C 0.1886(4) 0.2800(3) 0.07916(13) 0.0248(10) Uani 1 1 d . . . 
H11 H 0.2115 0.3389 0.1073 0.030 Uiso 1 1 calc R . . 
C12 C 0.1437(4) 0.1494(3) 0.09998(12) 0.0210(10) Uani 1 1 d . . . 
H12 H 0.2329 0.1107 0.1182 0.025 Uiso 1 1 calc R . . 
C13 C 0.1882(5) -0.0371(4) 0.04833(14) 0.0281(11) Uani 1 1 d . . . 
C14 C 0.1410(4) -0.0958(4) 0.00044(13) 0.0222(10) Uani 1 1 d . . . 
C15 C 0.2122(4) -0.2101(3) -0.01392(13) 0.0273(11) Uani 1 1 d . . . 
H15 H 0.2865 -0.2504 0.0067 0.033 Uiso 1 1 calc R . . 
C16 C 0.1725(5) -0.2630(3) -0.05840(14) 0.0286(11) Uani 1 1 d . . . 
C17 C 0.0647(5) -0.2078(4) -0.08899(13) 0.0316(11) Uani 1 1 d . . . 
H17 H 0.0384 -0.2474 -0.1194 0.038 Uiso 1 1 calc R . . 
C18 C -0.0052(4) -0.0939(4) -0.07498(14) 0.0318(10) Uani 1 1 d . . . 
H18 H -0.0797 -0.0547 -0.0958 0.038 Uiso 1 1 calc R . . 
C19 C 0.0338(4) -0.0370(3) -0.03036(14) 0.0269(11) Uani 1 1 d . . . 
H19 H -0.0126 0.0419 -0.0209 0.032 Uiso 1 1 calc R . . 
C20 C -0.1660(4) 0.3431(3) 0.15132(12) 0.0263(10) Uani 1 1 d . . . 
H20A H -0.2660 0.3810 0.1412 0.032 Uiso 1 1 calc R . . 
H20B H -0.1804 0.3036 0.1842 0.032 Uiso 1 1 calc R . . 
C21 C -0.0463(5) 0.4489(4) 0.15517(13) 0.0226(10) Uani 1 1 d . . . 
C22 C -0.0554(5) 0.5567(3) 0.12535(13) 0.0300(11) Uani 1 1 d . . . 
H22 H -0.1399 0.5656 0.1032 0.036 Uiso 1 1 calc R . . 
C23 C 0.0573(5) 0.6521(4) 0.12734(14) 0.0391(12) Uani 1 1 d . . . 
H23 H 0.0507 0.7246 0.1062 0.047 Uiso 1 1 calc R . . 
C24 C 0.1778(5) 0.6407(4) 0.15988(14) 0.0385(12) Uani 1 1 d . . . 
H24 H 0.2545 0.7059 0.1614 0.046 Uiso 1 1 calc R . . 
C25 C 0.1880(5) 0.5354(4) 0.19041(13) 0.0328(12) Uani 1 1 d . . . 
H25 H 0.2716 0.5272 0.2129 0.039 Uiso 1 1 calc R . . 
C26 C 0.0739(5) 0.4411(3) 0.18781(13) 0.0306(11) Uani 1 1 d . . . 
H26 H 0.0798 0.3693 0.2093 0.037 Uiso 1 1 calc R . . 
C27 C 0.0827(4) 0.4211(3) 0.01129(11) 0.0343(11) Uani 1 1 d . . . 
H27A H 0.0984 0.3728 -0.0193 0.051 Uiso 1 1 calc R . . 
H27B H 0.1753 0.4720 0.0185 0.051 Uiso 1 1 calc R . . 
H27C H -0.0064 0.4784 0.0075 0.051 Uiso 1 1 calc R . . 
 
loop_ 
 _atom_site_aniso_label 
 _atom_site_aniso_U_11 
 _atom_site_aniso_U_22 
 _atom_site_aniso_U_33 
 _atom_site_aniso_U_23 
 _atom_site_aniso_U_13 
 _atom_site_aniso_U_12 
Cl1 0.0641(9) 0.0248(6) 0.0446(6) -0.0074(6) 0.0166(7) 0.0051(6) 
O1 0.031(2) 0.0343(19) 0.0391(17) 0.0034(15) 0.0099(15) -0.0058(16) 
O2 0.032(2) 0.0297(17) 0.0357(17) -0.0035(14) -0.0088(15) 0.0055(16) 
O3 0.0256(18) 0.0316(19) 0.0260(17) -0.0010(14) 0.0087(15) -0.0051(14) 
O4 0.0272(17) 0.0172(16) 0.0251(15) -0.0076(13) -0.0012(12) 0.0028(14) 
O5 0.049(2) 0.0338(18) 0.0385(17) -0.0056(16) -0.0100(16) 0.0180(17) 
N1 0.020(2) 0.019(2) 0.022(2) 0.0017(17) 0.0057(17) -0.0004(18) 
N2 0.026(2) 0.016(2) 0.023(2) 0.0025(16) -0.0015(18) -0.0013(18) 
C1 0.033(3) 0.030(3) 0.024(2) 0.007(2) 0.002(2) 0.008(2) 
C2 0.037(3) 0.038(3) 0.043(3) -0.007(2) -0.013(3) 0.004(3) 
C3 0.046(4) 0.054(4) 0.050(4) 0.007(3) -0.023(3) -0.014(3) 
C4 0.032(3) 0.055(4) 0.054(3) 0.019(3) -0.005(3) 0.002(3) 
C5 0.035(3) 0.033(3) 0.039(3) 0.009(2) 0.006(3) 0.014(3) 
C6 0.031(3) 0.019(3) 0.026(2) 0.013(2) 0.000(2) 0.006(2) 
C7 0.036(3) 0.018(2) 0.031(3) 0.009(2) 0.002(2) -0.005(2) 
C8 0.042(3) 0.019(3) 0.022(3) -0.008(2) -0.002(2) 0.000(3) 
C9 0.018(3) 0.021(2) 0.024(2) -0.002(2) 0.000(2) -0.006(2) 
C10 0.031(3) 0.015(3) 0.033(3) -0.008(2) 0.000(2) 0.005(2) 
C11 0.029(3) 0.020(2) 0.025(2) -0.006(2) 0.002(2) -0.002(2) 
C12 0.023(3) 0.021(2) 0.020(2) -0.002(2) -0.004(2) 0.005(2) 
C13 0.026(3) 0.025(3) 0.034(3) 0.001(2) 0.008(2) -0.005(2) 
C14 0.023(3) 0.019(2) 0.025(2) -0.002(2) 0.005(2) -0.004(2) 
C15 0.036(3) 0.016(3) 0.030(3) 0.003(2) 0.008(2) 0.000(2) 
C16 0.041(3) 0.011(2) 0.034(3) -0.007(2) 0.016(2) -0.002(2) 
C17 0.037(3) 0.028(3) 0.030(3) -0.003(2) 0.003(2) -0.011(2) 
C18 0.027(3) 0.029(3) 0.040(3) -0.007(2) -0.001(2) 0.007(2) 
C19 0.028(3) 0.020(3) 0.033(3) -0.005(2) 0.005(2) -0.002(2) 
C20 0.020(3) 0.022(2) 0.037(3) -0.004(2) 0.002(2) 0.005(2) 
C21 0.026(3) 0.020(3) 0.022(2) -0.006(2) 0.002(2) 0.003(2) 
C22 0.035(3) 0.023(3) 0.032(3) -0.004(2) -0.001(2) 0.005(2) 
C23 0.059(4) 0.017(3) 0.040(3) 0.004(2) 0.002(3) -0.004(3) 
C24 0.044(3) 0.026(3) 0.046(3) -0.012(3) 0.006(3) -0.010(2) 
C25 0.029(3) 0.034(3) 0.035(3) -0.017(2) -0.004(2) 0.006(3) 
C26 0.043(3) 0.020(3) 0.029(3) -0.001(2) 0.001(2) 0.005(3) 
C27 0.046(3) 0.023(3) 0.034(3) 0.005(2) 0.003(2) 0.000(2) 
 
_geom_special_details 
; 
 All esds (except the esd in the dihedral angle between two l.s. planes) 
 are estimated using the full covariance matrix.  The cell esds are taken 
 into account individually in the estimation of esds in distances, angles 
 and torsion angles; correlations between esds in cell parameters are only 
 used when they are defined by crystal symmetry.  An approximate (isotropic) 
 treatment of cell esds is used for estimating esds involving l.s. planes. 
; 
 
loop_ 
 _geom_bond_atom_site_label_1 
 _geom_bond_atom_site_label_2 
 _geom_bond_distance 
 _geom_bond_site_symmetry_2 
 _geom_bond_publ_flag 
Cl1 C16 1.753(3) . ? 
O1 C8 1.215(4) . ? 
O2 C10 1.244(4) . ? 
O3 C11 1.378(4) . ? 
O3 H3O 0.8400 . ? 
O4 C13 1.362(4) . ? 
O4 C12 1.455(3) . ? 
O5 C13 1.204(4) . ? 
N1 C8 1.386(4) . ? 
N1 C12 1.421(4) . ? 
N1 C9 1.481(4) . ? 
N2 C10 1.347(4) . ? 
N2 C27 1.466(3) . ? 
N2 C11 1.479(4) . ? 
C1 C6 1.388(4) . ? 
C1 C2 1.395(5) . ? 
C1 H1 0.9500 . ? 
C2 C3 1.370(5) . ? 
C2 H2 0.9500 . ? 
C3 C4 1.386(5) . ? 
C3 H3 0.9500 . ? 
C4 C5 1.381(5) . ? 
C4 H4 0.9500 . ? 
C5 C6 1.382(5) . ? 
C5 H5 0.9500 . ? 
C6 C7 1.520(5) . ? 
C7 C8 1.527(4) . ? 
C7 H7A 0.9900 . ? 
C7 H7B 0.9900 . ? 
C9 C10 1.506(4) . ? 
C9 C20 1.563(4) . ? 
C9 H9 1.0000 . ? 
C11 C12 1.523(4) . ? 
C11 H11 1.0000 . ? 
C12 H12 1.0000 . ? 
C13 C14 1.493(4) . ? 
C14 C19 1.390(4) . ? 
C14 C15 1.396(4) . ? 
C15 C16 1.370(4) . ? 
C15 H15 0.9500 . ? 
C16 C17 1.374(4) . ? 
C17 C18 1.384(4) . ? 
C17 H17 0.9500 . ? 
C18 C19 1.390(4) . ? 
C18 H18 0.9500 . ? 
C19 H19 0.9500 . ? 
C20 C21 1.515(4) . ? 
C20 H20A 0.9900 . ? 
C20 H20B 0.9900 . ? 
C21 C26 1.368(4) . ? 
C21 C22 1.386(4) . ? 
C22 C23 1.393(4) . ? 
C22 H22 0.9500 . ? 
C23 C24 1.371(5) . ? 
C23 H23 0.9500 . ? 
C24 C25 1.377(4) . ? 
C24 H24 0.9500 . ? 
C25 C26 1.394(5) . ? 
C25 H25 0.9500 . ? 
C26 H26 0.9500 . ? 
C27 H27A 0.9800 . ? 
C27 H27B 0.9800 . ? 
C27 H27C 0.9800 . ? 
 
loop_ 
 _geom_angle_atom_site_label_1 
 _geom_angle_atom_site_label_2 
 _geom_angle_atom_site_label_3 
 _geom_angle 
 _geom_angle_site_symmetry_1 
 _geom_angle_site_symmetry_3 
 _geom_angle_publ_flag 
C11 O3 H3O 109.5 . . ? 
C13 O4 C12 118.8(3) . . ? 
C8 N1 C12 123.0(3) . . ? 
C8 N1 C9 116.8(3) . . ? 
C12 N1 C9 117.3(3) . . ? 
C10 N2 C27 120.2(3) . . ? 
C10 N2 C11 121.4(3) . . ? 
C27 N2 C11 118.3(3) . . ? 
C6 C1 C2 120.9(4) . . ? 
C6 C1 H1 119.5 . . ? 
C2 C1 H1 119.5 . . ? 
C3 C2 C1 118.9(4) . . ? 
C3 C2 H2 120.5 . . ? 
C1 C2 H2 120.5 . . ? 
C2 C3 C4 120.7(4) . . ? 
C2 C3 H3 119.7 . . ? 
C4 C3 H3 119.7 . . ? 
C5 C4 C3 120.1(5) . . ? 
C5 C4 H4 119.9 . . ? 
C3 C4 H4 119.9 . . ? 
C6 C5 C4 120.1(4) . . ? 
C6 C5 H5 119.9 . . ? 
C4 C5 H5 119.9 . . ? 
C5 C6 C1 119.1(4) . . ? 
C5 C6 C7 120.7(4) . . ? 
C1 C6 C7 120.1(4) . . ? 
C6 C7 C8 112.0(3) . . ? 
C6 C7 H7A 109.2 . . ? 
C8 C7 H7A 109.2 . . ? 
C6 C7 H7B 109.2 . . ? 
C8 C7 H7B 109.2 . . ? 
H7A C7 H7B 107.9 . . ? 
O1 C8 N1 121.1(4) . . ? 
O1 C8 C7 121.5(4) . . ? 
N1 C8 C7 117.3(4) . . ? 
N1 C9 C10 114.0(3) . . ? 
N1 C9 C20 111.8(3) . . ? 
C10 C9 C20 107.2(3) . . ? 
N1 C9 H9 107.9 . . ? 
C10 C9 H9 107.9 . . ? 
C20 C9 H9 107.9 . . ? 
O2 C10 N2 122.4(4) . . ? 
O2 C10 C9 118.3(4) . . ? 
N2 C10 C9 119.0(4) . . ? 
O3 C11 N2 111.6(3) . . ? 
O3 C11 C12 112.0(3) . . ? 
N2 C11 C12 107.9(3) . . ? 
O3 C11 H11 108.4 . . ? 
N2 C11 H11 108.4 . . ? 
C12 C11 H11 108.4 . . ? 
N1 C12 O4 109.8(3) . . ? 
N1 C12 C11 111.2(3) . . ? 
O4 C12 C11 105.0(3) . . ? 
N1 C12 H12 110.2 . . ? 
O4 C12 H12 110.2 . . ? 
C11 C12 H12 110.2 . . ? 
O5 C13 O4 123.7(4) . . ? 
O5 C13 C14 125.9(4) . . ? 
O4 C13 C14 110.4(3) . . ? 
C19 C14 C15 120.1(3) . . ? 
C19 C14 C13 121.7(4) . . ? 
C15 C14 C13 118.1(4) . . ? 
C16 C15 C14 118.6(3) . . ? 
C16 C15 H15 120.7 . . ? 
C14 C15 H15 120.7 . . ? 
C15 C16 C17 122.3(3) . . ? 
C15 C16 Cl1 119.6(3) . . ? 
C17 C16 Cl1 118.1(3) . . ? 
C16 C17 C18 119.2(4) . . ? 
C16 C17 H17 120.4 . . ? 
C18 C17 H17 120.4 . . ? 
C17 C18 C19 119.9(4) . . ? 
C17 C18 H18 120.0 . . ? 
C19 C18 H18 120.0 . . ? 
C18 C19 C14 119.9(3) . . ? 
C18 C19 H19 120.1 . . ? 
C14 C19 H19 120.1 . . ? 
C21 C20 C9 112.8(3) . . ? 
C21 C20 H20A 109.0 . . ? 
C9 C20 H20A 109.0 . . ? 
C21 C20 H20B 109.0 . . ? 
C9 C20 H20B 109.0 . . ? 
H20A C20 H20B 107.8 . . ? 
C26 C21 C22 118.0(4) . . ? 
C26 C21 C20 121.4(4) . . ? 
C22 C21 C20 120.7(4) . . ? 
C21 C22 C23 121.0(4) . . ? 
C21 C22 H22 119.5 . . ? 
C23 C22 H22 119.5 . . ? 
C24 C23 C22 119.7(4) . . ? 
C24 C23 H23 120.2 . . ? 
C22 C23 H23 120.2 . . ? 
C23 C24 C25 120.3(4) . . ? 
C23 C24 H24 119.8 . . ? 
C25 C24 H24 119.8 . . ? 
C24 C25 C26 119.0(4) . . ? 
C24 C25 H25 120.5 . . ? 
C26 C25 H25 120.5 . . ? 
C21 C26 C25 121.9(4) . . ? 
C21 C26 H26 119.0 . . ? 
C25 C26 H26 119.0 . . ? 
N2 C27 H27A 109.5 . . ? 
N2 C27 H27B 109.5 . . ? 
H27A C27 H27B 109.5 . . ? 
N2 C27 H27C 109.5 . . ? 
H27A C27 H27C 109.5 . . ? 
H27B C27 H27C 109.5 . . ? 
 
loop_ 
 _geom_torsion_atom_site_label_1 
 _geom_torsion_atom_site_label_2 
 _geom_torsion_atom_site_label_3 
 _geom_torsion_atom_site_label_4 
 _geom_torsion 
 _geom_torsion_site_symmetry_1 
 _geom_torsion_site_symmetry_2 
 _geom_torsion_site_symmetry_3 
 _geom_torsion_site_symmetry_4 
 _geom_torsion_publ_flag 
C6 C1 C2 C3 -1.2(6) . . . . ? 
C1 C2 C3 C4 0.0(6) . . . . ? 
C2 C3 C4 C5 0.3(6) . . . . ? 
C3 C4 C5 C6 0.6(6) . . . . ? 
C4 C5 C6 C1 -1.8(6) . . . . ? 
C4 C5 C6 C7 176.7(3) . . . . ? 
C2 C1 C6 C5 2.1(5) . . . . ? 
C2 C1 C6 C7 -176.4(3) . . . . ? 
C5 C6 C7 C8 -123.3(4) . . . . ? 
C1 C6 C7 C8 55.2(4) . . . . ? 
C12 N1 C8 O1 -162.7(3) . . . . ? 
C9 N1 C8 O1 -2.4(5) . . . . ? 
C12 N1 C8 C7 20.2(5) . . . . ? 
C9 N1 C8 C7 -179.5(3) . . . . ? 
C6 C7 C8 O1 -109.9(4) . . . . ? 
C6 C7 C8 N1 67.1(4) . . . . ? 
C8 N1 C9 C10 -165.0(3) . . . . ? 
C12 N1 C9 C10 -3.6(4) . . . . ? 
C8 N1 C9 C20 73.1(4) . . . . ? 
C12 N1 C9 C20 -125.4(3) . . . . ? 
C27 N2 C10 O2 8.8(5) . . . . ? 
C11 N2 C10 O2 -173.8(3) . . . . ? 
C27 N2 C10 C9 -165.0(3) . . . . ? 
C11 N2 C10 C9 12.4(5) . . . . ? 
N1 C9 C10 O2 158.6(3) . . . . ? 
C20 C9 C10 O2 -77.1(4) . . . . ? 
N1 C9 C10 N2 -27.3(4) . . . . ? 
C20 C9 C10 N2 97.0(4) . . . . ? 
C10 N2 C11 O3 153.3(3) . . . . ? 
C27 N2 C11 O3 -29.2(4) . . . . ? 
C10 N2 C11 C12 29.7(4) . . . . ? 
C27 N2 C11 C12 -152.8(3) . . . . ? 
C8 N1 C12 O4 90.6(4) . . . . ? 
C9 N1 C12 O4 -69.6(4) . . . . ? 
C8 N1 C12 C11 -153.6(3) . . . . ? 
C9 N1 C12 C11 46.1(4) . . . . ? 
C13 O4 C12 N1 -120.8(3) . . . . ? 
C13 O4 C12 C11 119.6(3) . . . . ? 
O3 C11 C12 N1 178.1(3) . . . . ? 
N2 C11 C12 N1 -58.5(4) . . . . ? 
O3 C11 C12 O4 -63.2(4) . . . . ? 
N2 C11 C12 O4 60.1(4) . . . . ? 
C12 O4 C13 O5 5.9(5) . . . . ? 
C12 O4 C13 C14 -174.7(3) . . . . ? 
O5 C13 C14 C19 -176.6(4) . . . . ? 
O4 C13 C14 C19 4.0(5) . . . . ? 
O5 C13 C14 C15 0.8(6) . . . . ? 
O4 C13 C14 C15 -178.6(3) . . . . ? 
C19 C14 C15 C16 -0.8(5) . . . . ? 
C13 C14 C15 C16 -178.3(3) . . . . ? 
C14 C15 C16 C17 -0.5(6) . . . . ? 
C14 C15 C16 Cl1 177.4(3) . . . . ? 
C15 C16 C17 C18 1.0(6) . . . . ? 
Cl1 C16 C17 C18 -176.9(3) . . . . ? 
C16 C17 C18 C19 -0.2(5) . . . . ? 
C17 C18 C19 C14 -1.1(5) . . . . ? 
C15 C14 C19 C18 1.6(5) . . . . ? 
C13 C14 C19 C18 179.0(3) . . . . ? 
N1 C9 C20 C21 69.4(4) . . . . ? 
C10 C9 C20 C21 -56.2(4) . . . . ? 
C9 C20 C21 C26 -88.9(4) . . . . ? 
C9 C20 C21 C22 90.8(4) . . . . ? 
C26 C21 C22 C23 2.2(5) . . . . ? 
C20 C21 C22 C23 -177.5(3) . . . . ? 
C21 C22 C23 C24 -1.2(6) . . . . ? 
C22 C23 C24 C25 0.3(6) . . . . ? 
C23 C24 C25 C26 -0.3(6) . . . . ? 
C22 C21 C26 C25 -2.2(6) . . . . ? 
C20 C21 C26 C25 177.5(3) . . . . ? 
C24 C25 C26 C21 1.3(6) . . . . ? 
 
loop_ 
 _geom_hbond_atom_site_label_D 
 _geom_hbond_atom_site_label_H 
 _geom_hbond_atom_site_label_A 
 _geom_hbond_distance_DH 
 _geom_hbond_distance_HA 
 _geom_hbond_distance_DA 
 _geom_hbond_angle_DHA 
 _geom_hbond_site_symmetry_A 
O3 H3O O2  0.84 1.87 2.688(3) 164.4 4 
 
_diffrn_measured_fraction_theta_max    0.998 
_diffrn_reflns_theta_full              23.27 
_diffrn_measured_fraction_theta_full   0.998 
_refine_diff_density_max    0.158 
_refine_diff_density_min   -0.182 
_refine_diff_density_rms    0.039 
