# Supplementary material for: The Outcome of the Oxidations of Unusual Enediamide Motifs Is Governed by the Stabilities of the Intermediate Iminium Ions
Source: PLoS One. 2012 Oct 19;7(10):e47224. doi: 10.1371/journal.pone.0047224 (PMC3477162; doi:10.1371/journal.pone.0047224)
Supplement: Cif S2 — Crystallographic data file for compound 6. (CIF) [file pone.0047224.s009.cif]

 
data_ma1 
 
_audit_creation_method            SHELXL-97 
_chemical_name_systematic 
; 
 ? 
; 
_chemical_name_common             ? 
_chemical_melting_point           ? 
_chemical_formula_moiety          ? 
_chemical_formula_sum 
 'C19 H22 N2 O4' 
_chemical_formula_weight          342.39 
 
loop_ 
 _atom_type_symbol 
 _atom_type_description 
 _atom_type_scat_dispersion_real 
 _atom_type_scat_dispersion_imag 
 _atom_type_scat_source 
 'C'  'C'   0.0033   0.0016 
 'International Tables Vol C Tables 4.2.6.8 and 6.1.1.4' 
 'H'  'H'   0.0000   0.0000 
 'International Tables Vol C Tables 4.2.6.8 and 6.1.1.4' 
 'N'  'N'   0.0061   0.0033 
 'International Tables Vol C Tables 4.2.6.8 and 6.1.1.4' 
 'O'  'O'   0.0106   0.0060 
 'International Tables Vol C Tables 4.2.6.8 and 6.1.1.4' 
 
_symmetry_cell_setting            Monoclinic
_symmetry_space_group_name_H-M    'P 1 21/c 1  '
_symmetry_space_group_name_Hall   '-P 2ybc     '
_symmetry_int_tables_number       14
 
loop_ 
 _symmetry_equiv_pos_as_xyz 
 'x, y, z' 
 '-x, y+1/2, -z+1/2' 
 '-x, -y, -z' 
 'x, -y-1/2, z-1/2' 
 
_cell_length_a                    10.449(2) 
_cell_length_b                    15.744(2) 
_cell_length_c                    10.855(2) 
_cell_angle_alpha                 90.00 
_cell_angle_beta                  100.646(5) 
_cell_angle_gamma                 90.00 
_cell_volume                      1755.0(5) 
_cell_formula_units_Z             4 
_cell_measurement_temperature     150(2) 
_cell_measurement_reflns_used     9101
_cell_measurement_theta_min       2.3061
_cell_measurement_theta_max       29.9393
 
_exptl_crystal_description        block
_exptl_crystal_colour             colorless
_exptl_crystal_size_max           0.30 
_exptl_crystal_size_mid           0.30 
_exptl_crystal_size_min           0.17 
_exptl_crystal_density_meas       ? 
_exptl_crystal_density_diffrn     1.296 
_exptl_crystal_density_method     'not measured' 
_exptl_crystal_F_000              728 
_exptl_absorpt_coefficient_mu     0.091 
_exptl_absorpt_correction_type    'multi-scan'
_exptl_absorpt_correction_T_min   0.879 
_exptl_absorpt_correction_T_max   0.985 
_exptl_absorpt_process_details
;
SADABS Ver. 2007/4 (Bruker-AXS, 2007)
;
 
_diffrn_crystal_treatment
;
attached with Exxon Paratone N, to a short length 
of fibre supported on a thin piece of copper wire 
inserted in a copper mounting pin.  The crystal was 
quenched in a cold nitrogen gas stream from an 
Oxford Cryosystems Cryostream. 
;
 
_diffrn_ambient_temperature       150(2) 
_diffrn_radiation_wavelength      0.71073 
_diffrn_radiation_type            MoK\a 
_diffrn_radiation_source          'fine-focus rotating anode' 
_diffrn_radiation_monochromator   graphite 
_diffrn_measurement_device_type   'Bruker-Nonius FR591 Kappa APEX II' 
_diffrn_measurement_method        '\f and \w'
_diffrn_detector_area_resol_mean  ? 
_diffrn_standards_number          0 
_diffrn_standards_interval_count  ? 
_diffrn_standards_interval_time   ? 
_diffrn_standards_decay_%         ?
_diffrn_reflns_number             19120 
_diffrn_reflns_av_R_equivalents   0.0263 
_diffrn_reflns_av_sigmaI/netI     0.0217 
_diffrn_reflns_limit_h_min        -14 
_diffrn_reflns_limit_h_max        14 
_diffrn_reflns_limit_k_min        -17 
_diffrn_reflns_limit_k_max        22 
_diffrn_reflns_limit_l_min        -15 
_diffrn_reflns_limit_l_max        13 
_diffrn_reflns_theta_min          2.59 
_diffrn_reflns_theta_max          29.98 
_reflns_number_total              5088 
_reflns_number_gt                 4286 
_reflns_threshold_expression      I>2\s(I) 
 
_computing_data_collection        'APEX2 Ver. 2008.1-0 (Bruker-AXS, 2008)'
_computing_cell_refinement        'SAINT Ver. 7.51A  (Bruker-AXS, 2008)'
_computing_data_reduction         'SAINT Ver. 7.51A'
_computing_structure_solution     'SHELXS-97 (Sheldrick, 1990)'
_computing_structure_refinement   'SHELXL-97 (Sheldrick, 1997)'
_computing_molecular_graphics
;
X-Seed (Barbour, 2001), SHELXTL Ver. 6.14 (Bruker-AXS, 2003)
;
_computing_publication_material   'modiCIFer-12162005 (Guzei, 2005)' 
 
_refine_special_details 
; 
 Refinement of F^2^ against ALL reflections.  The weighted R-factor wR and 
 goodness of fit S are based on F^2^, conventional R-factors R are based 
 on F, with F set to zero for negative F^2^. The threshold expression of 
 F^2^ > 2sigma(F^2^) is used only for calculating R-factors(gt) etc. and is 
 not relevant to the choice of reflections for refinement.  R-factors based 
 on F^2^ are statistically about twice as large as those based on F, and R- 
 factors based on ALL data will be even larger. 
; 
 
_refine_ls_structure_factor_coef  Fsqd  
_refine_ls_matrix_type            full 
_refine_ls_weighting_scheme       calc  
_refine_ls_weighting_details 
 'calc w=1/[\s^2^(Fo^2^)+(0.0636P)^2^+0.7791P] where P=(Fo^2^+2Fc^2^)/3' 
_atom_sites_solution_primary      direct 
_atom_sites_solution_secondary    difmap 
_atom_sites_solution_hydrogens    geom 
_refine_ls_hydrogen_treatment     constr 
_refine_ls_extinction_method      none 
_refine_ls_extinction_coef        ? 
_refine_ls_number_reflns          5088 
_refine_ls_number_parameters      226 
_refine_ls_number_restraints      0 
_refine_ls_R_factor_all           0.0591 
_refine_ls_R_factor_gt            0.0504 
_refine_ls_wR_factor_ref          0.1398 
_refine_ls_wR_factor_gt           0.1324 
_refine_ls_goodness_of_fit_ref    1.043 
_refine_ls_restrained_S_all       1.043 
_refine_ls_shift/su_max           0.000 
_refine_ls_shift/su_mean          0.000 
 
loop_ 
 _atom_site_label 
 _atom_site_type_symbol 
 _atom_site_fract_x 
 _atom_site_fract_y 
 _atom_site_fract_z 
 _atom_site_U_iso_or_equiv 
 _atom_site_adp_type 
 _atom_site_occupancy 
 _atom_site_symmetry_multiplicity 
 _atom_site_calc_flag 
 _atom_site_refinement_flags 
 _atom_site_disorder_assembly 
 _atom_site_disorder_group 
O1 O 0.39950(8) 0.57618(6) 0.35216(9) 0.0302(2) Uani 1 1 d . . . 
O2 O 0.10218(9) 0.43055(6) 0.42268(10) 0.0361(2) Uani 1 1 d . . . 
O3 O 0.28521(12) 0.44039(6) 0.70603(9) 0.0383(3) Uani 1 1 d . . . 
O4 O 0.35211(19) 0.28492(7) 0.37320(11) 0.0661(5) Uani 1 1 d . . . 
N1 N 0.18409(9) 0.55424(6) 0.36155(10) 0.0231(2) Uani 1 1 d . . . 
N2 N 0.32490(10) 0.36201(6) 0.54140(9) 0.02091(19) Uani 1 1 d . . . 
C1 C 0.28779(11) 0.60226(7) 0.33254(11) 0.0213(2) Uani 1 1 d . . . 
C2 C 0.25380(12) 0.68811(7) 0.27719(11) 0.0249(2) Uani 1 1 d . . . 
C3 C 0.34559(14) 0.72975(9) 0.21964(14) 0.0350(3) Uani 1 1 d . . . 
H3 H 0.4243 0.7021 0.2113 0.042 Uiso 1 1 calc R . . 
C4 C 0.32023(17) 0.81243(10) 0.17453(17) 0.0470(4) Uani 1 1 d . . . 
H4 H 0.3816 0.8410 0.1347 0.056 Uiso 1 1 calc R . . 
C5 C 0.20564(19) 0.85285(10) 0.18781(17) 0.0488(4) Uani 1 1 d . . . 
H5 H 0.1899 0.9095 0.1588 0.059 Uiso 1 1 calc R . . 
C6 C 0.11394(17) 0.81113(9) 0.24309(16) 0.0430(4) Uani 1 1 d . . . 
H6 H 0.0353 0.8391 0.2508 0.052 Uiso 1 1 calc R . . 
C7 C 0.13649(13) 0.72794(8) 0.28772(12) 0.0301(3) Uani 1 1 d . . . 
C8 C 0.03973(14) 0.67886(9) 0.34643(14) 0.0367(3) Uani 1 1 d . . . 
H8A H -0.0494 0.6996 0.3130 0.044 Uiso 1 1 calc R . . 
H8B H 0.0576 0.6879 0.4383 0.044 Uiso 1 1 calc R . . 
C9 C 0.04850(12) 0.58478(9) 0.31835(14) 0.0339(3) Uani 1 1 d . . . 
H9A H -0.0117 0.5526 0.3615 0.041 Uiso 1 1 calc R . . 
H9B H 0.0223 0.5750 0.2271 0.041 Uiso 1 1 calc R . . 
C10 C 0.19789(11) 0.47302(7) 0.41672(10) 0.0223(2) Uani 1 1 d . . . 
C11 C 0.33415(11) 0.44057(7) 0.47150(11) 0.0212(2) Uani 1 1 d . . . 
H11A H 0.3829 0.4298 0.4031 0.025 Uiso 1 1 calc R . . 
H11B H 0.3819 0.4840 0.5280 0.025 Uiso 1 1 calc R . . 
C13 C 0.30476(12) 0.37144(7) 0.66300(11) 0.0246(2) Uani 1 1 d . . . 
H13 H 0.3063 0.3225 0.7144 0.030 Uiso 1 1 calc R . . 
C14 C 0.33386(17) 0.28427(8) 0.48123(12) 0.0354(3) Uani 1 1 d . . . 
C15 C 0.31592(17) 0.20143(8) 0.54804(12) 0.0352(3) Uani 1 1 d . . . 
H15 H 0.3201 0.2133 0.6392 0.042 Uiso 1 1 calc R . . 
C16 C 0.18242(18) 0.16515(12) 0.49345(18) 0.0495(4) Uani 1 1 d . . . 
H16A H 0.1757 0.1559 0.4023 0.059 Uiso 1 1 calc R . . 
H16B H 0.1141 0.2062 0.5057 0.059 Uiso 1 1 calc R . . 
C17 C 0.1606(3) 0.08065(14) 0.5572(2) 0.0699(6) Uani 1 1 d . . . 
H17A H 0.1587 0.0909 0.6468 0.084 Uiso 1 1 calc R . . 
H17B H 0.0755 0.0565 0.5175 0.084 Uiso 1 1 calc R . . 
C18 C 0.2683(3) 0.01757(10) 0.54611(17) 0.0747(8) Uani 1 1 d . . . 
H18A H 0.2548 -0.0353 0.5915 0.090 Uiso 1 1 calc R . . 
H18B H 0.2649 0.0031 0.4568 0.090 Uiso 1 1 calc R . . 
C19 C 0.4002(3) 0.05477(11) 0.60028(17) 0.0632(6) Uani 1 1 d . . . 
H19A H 0.4692 0.0135 0.5907 0.076 Uiso 1 1 calc R . . 
H19B H 0.4056 0.0657 0.6909 0.076 Uiso 1 1 calc R . . 
C20 C 0.42283(19) 0.13797(10) 0.53372(15) 0.0458(4) Uani 1 1 d . . . 
H20A H 0.5091 0.1618 0.5708 0.055 Uiso 1 1 calc R . . 
H20B H 0.4216 0.1269 0.4437 0.055 Uiso 1 1 calc R . . 
 
loop_ 
 _atom_site_aniso_label 
 _atom_site_aniso_U_11 
 _atom_site_aniso_U_22 
 _atom_site_aniso_U_33 
 _atom_site_aniso_U_23 
 _atom_site_aniso_U_13 
 _atom_site_aniso_U_12 
O1 0.0220(4) 0.0269(4) 0.0415(5) 0.0117(4) 0.0051(3) 0.0015(3) 
O2 0.0280(4) 0.0315(5) 0.0452(6) 0.0126(4) -0.0026(4) -0.0097(4) 
O3 0.0649(7) 0.0230(4) 0.0306(5) -0.0024(4) 0.0182(5) 0.0082(4) 
O4 0.1548(15) 0.0237(5) 0.0278(5) -0.0001(4) 0.0378(7) -0.0009(7) 
N1 0.0201(4) 0.0200(4) 0.0287(5) 0.0056(4) 0.0029(4) 0.0005(3) 
N2 0.0287(5) 0.0157(4) 0.0185(4) 0.0017(3) 0.0050(3) 0.0006(3) 
C1 0.0230(5) 0.0178(5) 0.0224(5) 0.0021(4) 0.0020(4) -0.0008(4) 
C2 0.0285(5) 0.0181(5) 0.0259(5) 0.0035(4) -0.0002(4) -0.0008(4) 
C3 0.0319(6) 0.0297(6) 0.0414(7) 0.0127(6) 0.0019(5) -0.0050(5) 
C4 0.0490(9) 0.0335(7) 0.0542(9) 0.0207(7) -0.0013(7) -0.0118(6) 
C5 0.0634(10) 0.0232(6) 0.0538(10) 0.0147(6) -0.0046(8) 0.0004(6) 
C6 0.0542(9) 0.0260(7) 0.0464(8) 0.0081(6) 0.0029(7) 0.0142(6) 
C7 0.0361(6) 0.0222(6) 0.0301(6) 0.0037(5) 0.0013(5) 0.0060(5) 
C8 0.0332(6) 0.0366(7) 0.0417(7) 0.0112(6) 0.0108(6) 0.0148(5) 
C9 0.0195(5) 0.0338(7) 0.0474(8) 0.0138(6) 0.0032(5) 0.0028(5) 
C10 0.0250(5) 0.0191(5) 0.0217(5) 0.0014(4) 0.0015(4) -0.0020(4) 
C11 0.0252(5) 0.0162(5) 0.0223(5) 0.0033(4) 0.0047(4) 0.0006(4) 
C13 0.0332(6) 0.0209(5) 0.0207(5) 0.0013(4) 0.0075(4) 0.0025(4) 
C14 0.0688(10) 0.0180(5) 0.0211(6) -0.0001(4) 0.0127(6) 0.0009(6) 
C15 0.0719(10) 0.0158(5) 0.0202(5) 0.0005(4) 0.0143(6) 0.0018(5) 
C16 0.0564(10) 0.0458(9) 0.0502(9) 0.0146(7) 0.0199(8) -0.0008(7) 
C17 0.0958(17) 0.0593(12) 0.0574(12) 0.0148(10) 0.0215(11) -0.0336(12) 
C18 0.172(3) 0.0200(7) 0.0364(8) 0.0006(6) 0.0304(12) -0.0157(11) 
C19 0.1206(19) 0.0352(8) 0.0393(9) 0.0168(7) 0.0293(10) 0.0332(10) 
C20 0.0654(10) 0.0385(8) 0.0335(7) 0.0126(6) 0.0091(7) 0.0124(7) 
 
_geom_special_details 
; 
 All esds (except the esd in the dihedral angle between two l.s. planes) 
 are estimated using the full covariance matrix.  The cell esds are taken 
 into account individually in the estimation of esds in distances, angles 
 and torsion angles; correlations between esds in cell parameters are only 
 used when they are defined by crystal symmetry.  An approximate (isotropic) 
 treatment of cell esds is used for estimating esds involving l.s. planes. 
; 
 
loop_ 
 _geom_bond_atom_site_label_1 
 _geom_bond_atom_site_label_2 
 _geom_bond_distance 
 _geom_bond_site_symmetry_2 
 _geom_bond_publ_flag 
O1 C1 1.2184(14) . ? 
O2 C10 1.2146(14) . ? 
O3 C13 1.2140(15) . ? 
O4 C14 1.2224(17) . ? 
N1 C1 1.4039(14) . ? 
N1 C10 1.4081(14) . ? 
N1 C9 1.4876(15) . ? 
N2 C13 1.3825(15) . ? 
N2 C14 1.3986(15) . ? 
N2 C11 1.4636(14) . ? 
C1 C2 1.4951(15) . ? 
C2 C7 1.4003(18) . ? 
C2 C3 1.4004(18) . ? 
C3 C4 1.3989(19) . ? 
C3 H3 0.9500 . ? 
C4 C5 1.387(3) . ? 
C4 H4 0.9500 . ? 
C5 C6 1.386(3) . ? 
C5 H5 0.9500 . ? 
C6 C7 1.4011(18) . ? 
C6 H6 0.9500 . ? 
C7 C8 1.504(2) . ? 
C8 C9 1.518(2) . ? 
C8 H8A 0.9900 . ? 
C8 H8B 0.9900 . ? 
C9 H9A 0.9900 . ? 
C9 H9B 0.9900 . ? 
C10 C11 1.5261(16) . ? 
C11 H11A 0.9900 . ? 
C11 H11B 0.9900 . ? 
C13 H13 0.9500 . ? 
C14 C15 1.5205(17) . ? 
C15 C16 1.522(3) . ? 
C15 C20 1.528(2) . ? 
C15 H15 1.0000 . ? 
C16 C17 1.536(2) . ? 
C16 H16A 0.9900 . ? 
C16 H16B 0.9900 . ? 
C17 C18 1.522(4) . ? 
C17 H17A 0.9900 . ? 
C17 H17B 0.9900 . ? 
C18 C19 1.514(4) . ? 
C18 H18A 0.9900 . ? 
C18 H18B 0.9900 . ? 
C19 C20 1.535(2) . ? 
C19 H19A 0.9900 . ? 
C19 H19B 0.9900 . ? 
C20 H20A 0.9900 . ? 
C20 H20B 0.9900 . ? 
 
loop_ 
 _geom_angle_atom_site_label_1 
 _geom_angle_atom_site_label_2 
 _geom_angle_atom_site_label_3 
 _geom_angle 
 _geom_angle_site_symmetry_1 
 _geom_angle_site_symmetry_3 
 _geom_angle_publ_flag 
C1 N1 C10 124.18(9) . . ? 
C1 N1 C9 119.00(10) . . ? 
C10 N1 C9 116.39(9) . . ? 
C13 N2 C14 125.10(10) . . ? 
C13 N2 C11 116.14(9) . . ? 
C14 N2 C11 118.75(9) . . ? 
O1 C1 N1 122.24(10) . . ? 
O1 C1 C2 121.58(10) . . ? 
N1 C1 C2 116.17(10) . . ? 
C7 C2 C3 120.58(11) . . ? 
C7 C2 C1 121.24(11) . . ? 
C3 C2 C1 118.10(11) . . ? 
C4 C3 C2 119.39(14) . . ? 
C4 C3 H3 120.3 . . ? 
C2 C3 H3 120.3 . . ? 
C5 C4 C3 120.13(15) . . ? 
C5 C4 H4 119.9 . . ? 
C3 C4 H4 119.9 . . ? 
C6 C5 C4 120.44(13) . . ? 
C6 C5 H5 119.8 . . ? 
C4 C5 H5 119.8 . . ? 
C5 C6 C7 120.46(15) . . ? 
C5 C6 H6 119.8 . . ? 
C7 C6 H6 119.8 . . ? 
C2 C7 C6 118.96(13) . . ? 
C2 C7 C8 118.13(11) . . ? 
C6 C7 C8 122.91(13) . . ? 
C7 C8 C9 110.23(11) . . ? 
C7 C8 H8A 109.6 . . ? 
C9 C8 H8A 109.6 . . ? 
C7 C8 H8B 109.6 . . ? 
C9 C8 H8B 109.6 . . ? 
H8A C8 H8B 108.1 . . ? 
N1 C9 C8 109.96(11) . . ? 
N1 C9 H9A 109.7 . . ? 
C8 C9 H9A 109.7 . . ? 
N1 C9 H9B 109.7 . . ? 
C8 C9 H9B 109.7 . . ? 
H9A C9 H9B 108.2 . . ? 
O2 C10 N1 120.12(11) . . ? 
O2 C10 C11 120.87(10) . . ? 
N1 C10 C11 118.99(9) . . ? 
N2 C11 C10 109.79(9) . . ? 
N2 C11 H11A 109.7 . . ? 
C10 C11 H11A 109.7 . . ? 
N2 C11 H11B 109.7 . . ? 
C10 C11 H11B 109.7 . . ? 
H11A C11 H11B 108.2 . . ? 
O3 C13 N2 121.97(11) . . ? 
O3 C13 H13 119.0 . . ? 
N2 C13 H13 119.0 . . ? 
O4 C14 N2 118.45(12) . . ? 
O4 C14 C15 121.31(12) . . ? 
N2 C14 C15 120.20(11) . . ? 
C14 C15 C16 108.72(13) . . ? 
C14 C15 C20 110.82(13) . . ? 
C16 C15 C20 110.46(13) . . ? 
C14 C15 H15 108.9 . . ? 
C16 C15 H15 108.9 . . ? 
C20 C15 H15 108.9 . . ? 
C15 C16 C17 110.56(15) . . ? 
C15 C16 H16A 109.5 . . ? 
C17 C16 H16A 109.5 . . ? 
C15 C16 H16B 109.5 . . ? 
C17 C16 H16B 109.5 . . ? 
H16A C16 H16B 108.1 . . ? 
C18 C17 C16 110.89(17) . . ? 
C18 C17 H17A 109.5 . . ? 
C16 C17 H17A 109.5 . . ? 
C18 C17 H17B 109.5 . . ? 
C16 C17 H17B 109.5 . . ? 
H17A C17 H17B 108.0 . . ? 
C19 C18 C17 110.52(15) . . ? 
C19 C18 H18A 109.5 . . ? 
C17 C18 H18A 109.5 . . ? 
C19 C18 H18B 109.5 . . ? 
C17 C18 H18B 109.5 . . ? 
H18A C18 H18B 108.1 . . ? 
C18 C19 C20 110.83(16) . . ? 
C18 C19 H19A 109.5 . . ? 
C20 C19 H19A 109.5 . . ? 
C18 C19 H19B 109.5 . . ? 
C20 C19 H19B 109.5 . . ? 
H19A C19 H19B 108.1 . . ? 
C15 C20 C19 109.35(14) . . ? 
C15 C20 H20A 109.8 . . ? 
C19 C20 H20A 109.8 . . ? 
C15 C20 H20B 109.8 . . ? 
C19 C20 H20B 109.8 . . ? 
H20A C20 H20B 108.3 . . ? 
 
loop_ 
 _geom_torsion_atom_site_label_1 
 _geom_torsion_atom_site_label_2 
 _geom_torsion_atom_site_label_3 
 _geom_torsion_atom_site_label_4 
 _geom_torsion 
 _geom_torsion_site_symmetry_1 
 _geom_torsion_site_symmetry_2 
 _geom_torsion_site_symmetry_3 
 _geom_torsion_site_symmetry_4 
 _geom_torsion_publ_flag 
C10 N1 C1 O1 0.84(18) . . . . ? 
C9 N1 C1 O1 -171.30(12) . . . . ? 
C10 N1 C1 C2 -178.50(10) . . . . ? 
C9 N1 C1 C2 9.36(16) . . . . ? 
O1 C1 C2 C7 -161.29(12) . . . . ? 
N1 C1 C2 C7 18.06(17) . . . . ? 
O1 C1 C2 C3 15.58(18) . . . . ? 
N1 C1 C2 C3 -165.07(12) . . . . ? 
C7 C2 C3 C4 1.2(2) . . . . ? 
C1 C2 C3 C4 -175.73(13) . . . . ? 
C2 C3 C4 C5 0.5(2) . . . . ? 
C3 C4 C5 C6 -1.5(3) . . . . ? 
C4 C5 C6 C7 0.8(3) . . . . ? 
C3 C2 C7 C6 -1.9(2) . . . . ? 
C1 C2 C7 C6 174.92(12) . . . . ? 
C3 C2 C7 C8 177.90(13) . . . . ? 
C1 C2 C7 C8 -5.31(18) . . . . ? 
C5 C6 C7 C2 0.9(2) . . . . ? 
C5 C6 C7 C8 -178.87(15) . . . . ? 
C2 C7 C8 C9 -31.90(17) . . . . ? 
C6 C7 C8 C9 147.86(14) . . . . ? 
C1 N1 C9 C8 -46.29(16) . . . . ? 
C10 N1 C9 C8 140.97(12) . . . . ? 
C7 C8 C9 N1 55.94(15) . . . . ? 
C1 N1 C10 O2 -169.54(12) . . . . ? 
C9 N1 C10 O2 2.78(17) . . . . ? 
C1 N1 C10 C11 12.03(17) . . . . ? 
C9 N1 C10 C11 -175.64(11) . . . . ? 
C13 N2 C11 C10 -82.61(12) . . . . ? 
C14 N2 C11 C10 96.00(13) . . . . ? 
O2 C10 C11 N2 -7.62(16) . . . . ? 
N1 C10 C11 N2 170.80(10) . . . . ? 
C14 N2 C13 O3 -172.67(14) . . . . ? 
C11 N2 C13 O3 5.84(18) . . . . ? 
C13 N2 C14 O4 -179.87(15) . . . . ? 
C11 N2 C14 O4 1.7(2) . . . . ? 
C13 N2 C14 C15 2.4(2) . . . . ? 
C11 N2 C14 C15 -176.04(13) . . . . ? 
O4 C14 C15 C16 -72.5(2) . . . . ? 
N2 C14 C15 C16 105.09(16) . . . . ? 
O4 C14 C15 C20 49.1(2) . . . . ? 
N2 C14 C15 C20 -133.32(15) . . . . ? 
C14 C15 C16 C17 179.30(15) . . . . ? 
C20 C15 C16 C17 57.50(18) . . . . ? 
C15 C16 C17 C18 -56.2(2) . . . . ? 
C16 C17 C18 C19 56.3(2) . . . . ? 
C17 C18 C19 C20 -57.96(19) . . . . ? 
C14 C15 C20 C19 -179.03(14) . . . . ? 
C16 C15 C20 C19 -58.48(17) . . . . ? 
C18 C19 C20 C15 58.86(19) . . . . ? 
 
_diffrn_measured_fraction_theta_max    0.995 
_diffrn_reflns_theta_full              29.98 
_diffrn_measured_fraction_theta_full   0.995 
_refine_diff_density_max    0.779 
_refine_diff_density_min   -0.591 
_refine_diff_density_rms    0.046 
